# Supplementary material for: Identification and functional analysis of a biflavone as a novel inhibitor of transient receptor potential vanilloid 4-dependent atherogenic processes
Source: PubMed Central journal article supplement (PMC8047007; doi:10.1038/s41598-021-87696-9), 2021-04-14
Supplement: 41598_2021_87696_MOESM1_ESM.pdf [file 41598_2021_87696_MOESM1_ESM.pdf]

**Identification and functional analysis of a biflavone as a novel inhibitor of Transient Receptor Potential Vanilloid 4-dependent atherogenic processes**

Mazen O. Alharbi<sup>1</sup>, Bidisha Dutta<sup>1</sup>, Rishov Goswami<sup>1</sup>, Shweta Sharma<sup>1</sup>, Kai Y. Lei<sup>1</sup>,  
Shaik O. Rahaman<sup>1</sup>

<sup>1</sup>University of Maryland, Department of Nutrition and Food Science, College Park, MD 20742

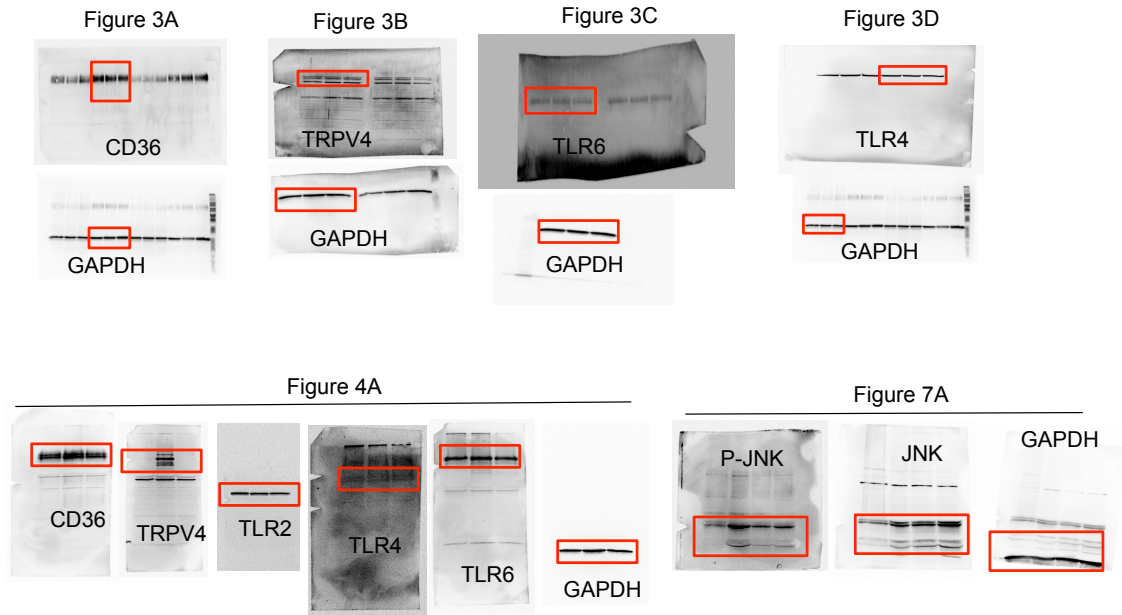

**Supplementary Figure 1. Immunoblots of the cropped image shown in Figure 3A-D, Figure 4A, and Figure 7A. The cropped areas on the blots are indicated with red-color boxes.**
